# Supplementary material
Source: PubMed Central journal article supplement (PMC4224182)
Supplement: 8ce2e2cf243b4ee9f4326c2fd5972c76_genetics.114.166009-8.pdf [file 8ce2e2cf243b4ee9f4326c2fd5972c76_genetics.114.166009-8.pdf]

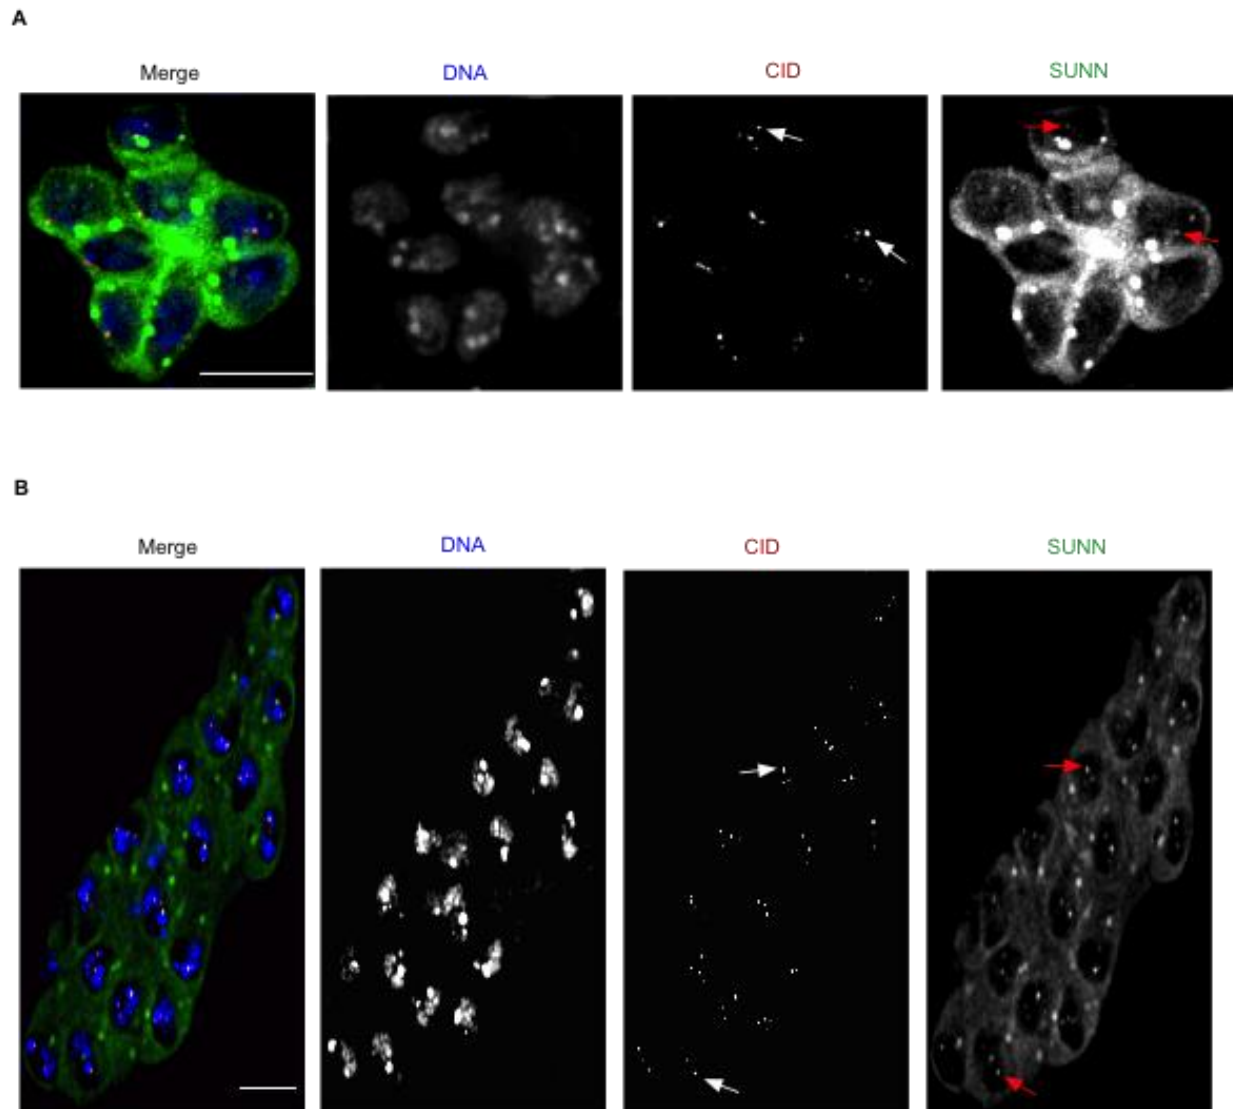

**Figure S6** SUNN co-localizes with CID in male germ cells. 8 cell spermatogonial (mitotic) cysts (A) and 16-cell stage S1 (meiotic) spermatocyte cysts (B) from  $w/B^sYy^+$ ;  $UASp-SUNN::Venus$ ;  $sunn^{Z3-5839}/Df, nos-GAL4::VP16$  males were stained with anti-CID antibody and DAPI. Co-localizing SUNN::Venus and CID spots are indicated with red and white arrows respectively. The level of SUNN::Venus co-localizing with CID is higher at the sixteen-cell stage when compared to eight-cell stage. SUNN::Venus also localizes to the cytoplasm and between cells in the cyst during two-cell cyst, four-cell cyst stage, (not shown) and eight-cell cyst stages. This localization decreases in 16 cell cysts and is inconspicuous by S2. In pre-16 cell cysts, very large SUNN foci are also observed which do not co-localize with CID and are present on DNA periphery. The functional relevance of this localization is not clear. Scale bars = 10  $\mu$ M.
