# Supplementary material
Source: PubMed Central journal article supplement (PMC4224182)
Supplement: c1fac005b0f7129b6cf75972988aa619_genetics.114.166009-7.pdf [file c1fac005b0f7129b6cf75972988aa619_genetics.114.166009-7.pdf]

**Table S3** UASp-SUNN::Venus rescues *sun*n mutant NDJ phenotype in *Drosophila* females

| Female Genotype                                                                             | X   | XX | O | n <sup>a</sup> | <sup>b</sup> %NDJ |
|---------------------------------------------------------------------------------------------|-----|----|---|----------------|-------------------|
| <i>UASp-SUNN::Venus</i> ; <u><i>sun</i>n<sup>Z3-5839</sup></u><br><i>Df, nos-GAL4::VP16</i> | 593 | 10 | 5 | <b>608</b>     | 4.9               |
| <u><i>sun</i>n<sup>Z3-5839</sup></u><br><i>Df, nos-GAL4::VP16</i>                           | 12  | 10 | 4 | <b>26</b>      | 70                |
| <u><i>sun</i>n<sup>Z3-5839</sup> or <i>Df, nos-GAL4::VP16</i></u><br>+                      | 269 | 0  | 0 | <b>269</b>     | 0                 |

*w*/+ females with the indicated second and third chromosome genotype were each crossed to 2 *YSX.YL, In(1)EN, y B* males.  
<sup>a</sup>total number of progeny scored. <sup>b</sup>%NDJ = 100 x 2 (XX + O) / (n + XX + O).
